# Supplementary material for: Polar 2D hybrid perovskite crystals with intrinsic strong linear dichroism for polarization-sensitive and self-powered detection
Source: Royal Society of Chemistry journal article supplement (doi:10.1039/d3tc00199g), 2023-01-01
Supplement: d3tc00199g1.pdf [file d3tc00199g1.pdf]

Electronic Supplementary Material (ESI) for Journal of Materials Chemistry C.  
This journal is © The Royal Society of Chemistry 2023

## Supporting Information

### Polar 2D Hybrid Perovskite Crystals with Intrinsic Strong Linear Dichroism for Polarization-Sensitive and Self-Powered Detection

Yaoyao Chen,<sup>a,b</sup> Liwei Tang,<sup>b</sup> Yi Liu,<sup>b</sup> Tian Yang,<sup>a,b</sup> Lina Hua,<sup>a,b</sup> Xi Zeng,<sup>b</sup> Junhua Luo<sup>b,c</sup>,  
Zhihua Sun,<sup>a,b,c\*</sup>

<sup>a</sup> College of Chemistry, Fuzhou University, Fuzhou 350116, China

<sup>b</sup> State Key Laboratory of Structural Chemistry, Fujian Institute of Research on the Structure of  
Matter, Chinese Academy of Sciences, Fuzhou, Fujian 350002, P. R. China

<sup>c</sup> Fujian Science & Technology Innovation Laboratory for Optoelectronic Information of China,  
Fuzhou, Fujian 350108, People's Republic of China

Figure

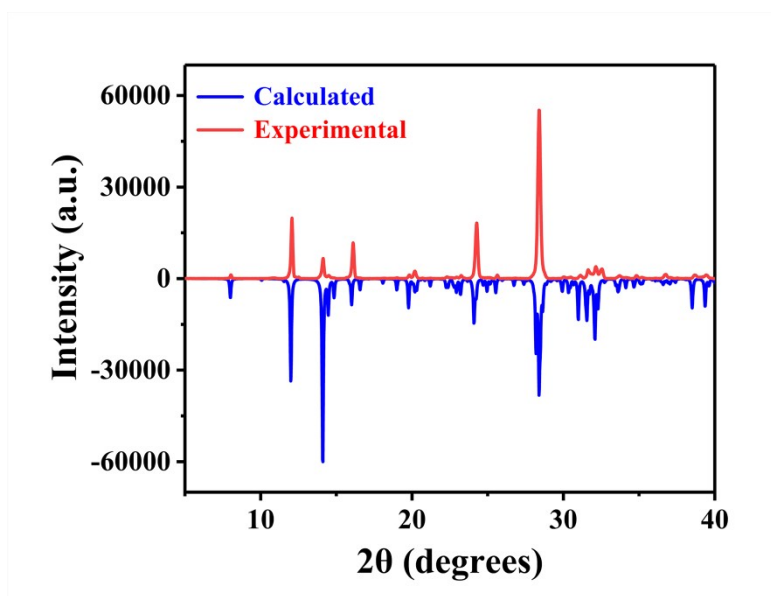

Figure S1. Experimental and calculated powder X-ray diffraction patterns of **1** at 298K.

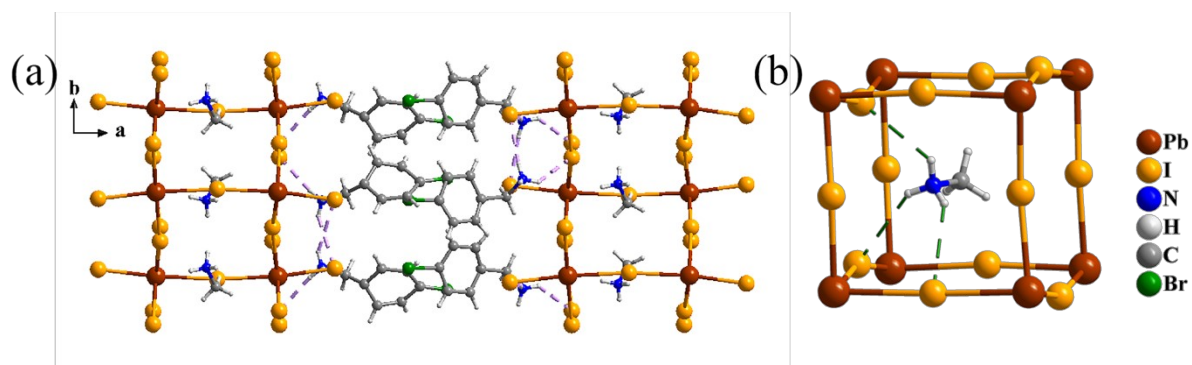

**Figure S2.** (a) Hydrogen-bonding N-H...I interactions between the organic BBA<sup>+</sup> and inorganic perovskite frameworks. (b) Hydrogen-bonding N-H...I interactions between the organic MA<sup>+</sup> and inorganic perovskite frameworks.

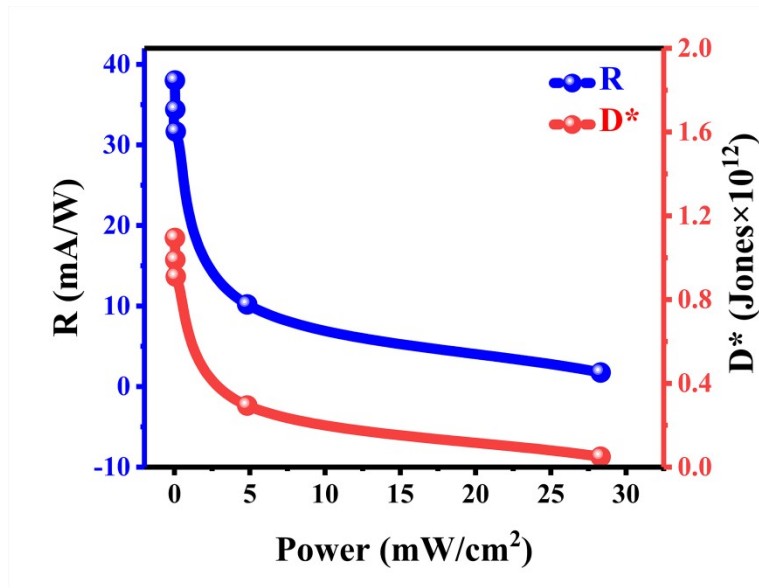

**Figure S3.** Photoresponsivity and detectivity of **1** under various incident-light power density at

520 nm. The responsivity is defined as  $R = \frac{I_{\text{light}}}{P}$ , where  $I_{\text{light}}$  is the photocurrent and  $P$  is the

incident light power.<sup>1</sup> The detectivity is defined as  $D^* = \frac{R\sqrt{A}f}{i_n}$ , where  $A$  is the effective illumination area of the photodetector,  $f$  is the electric bandwidth, and  $i_n$  is the noise current.

The shot noise ( $i_{n,s}$ ) is defined as  $i_{n,s} = \sqrt{2qi_d/A}$ , where  $i_d$  is the dark current,  $q$  is the absolute value of electron charge. If, as expected, the shot noise from the dark current is the major

contribution, the detectivity can be expressed as  $D^* = \frac{R}{\sqrt{2qi_d/A}}$ .<sup>1,2</sup>

[1] X. Gong, M. Tong, Y. Xia, W. Cai, J. Moon, Y. Cao, G. Yu, C. Shieh, B. Nilsson and A. Heeger, High-Detectivity Polymer Photodetectors with Spectral Response from 300 nm to 1450 nm, *Science*, 2009, **325**, 1665-1667.

[2] K. Yang, Z. Zhao, M. Liu, L. Niu, X. Zhao, G. Yuan, X. Ma and F. Zhang, Highly sensitive broadband photomultiplication type all-polymer photodetectors and their applications in optical pulse counting, *J. Mater. Chem. C*, 2022, **10**, 10888-10894.

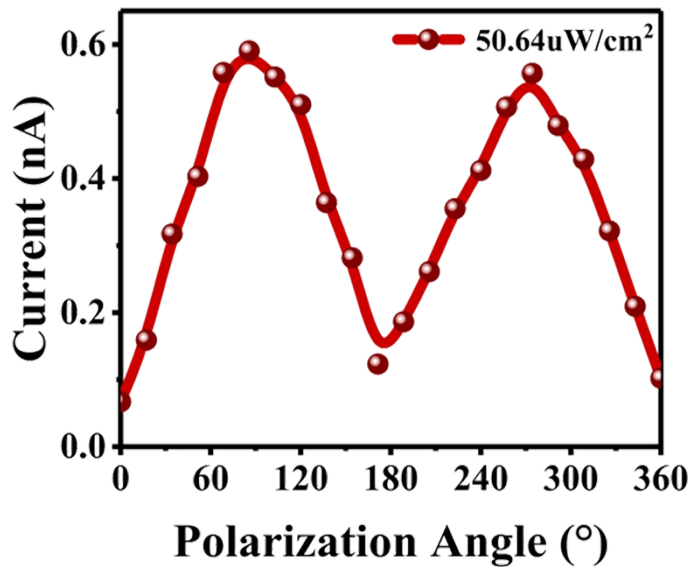

**Figure S4.** Polarization-dependent photocurrents ( $V_{\text{bias}} = 0 \text{ V}$ , at 520 nm).

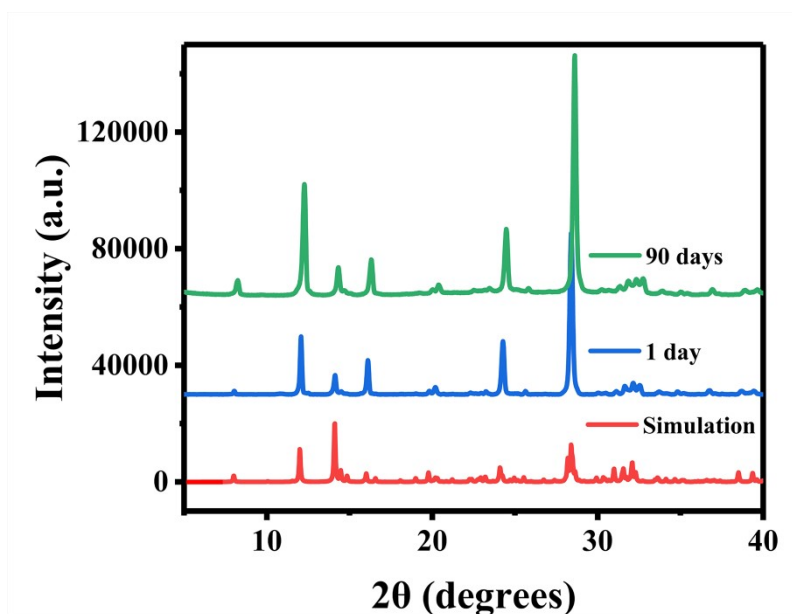

**Figure S5.** Powder X-ray diffraction patterns of **1** recorded on the sample after 1 day and 90 days, respectively.

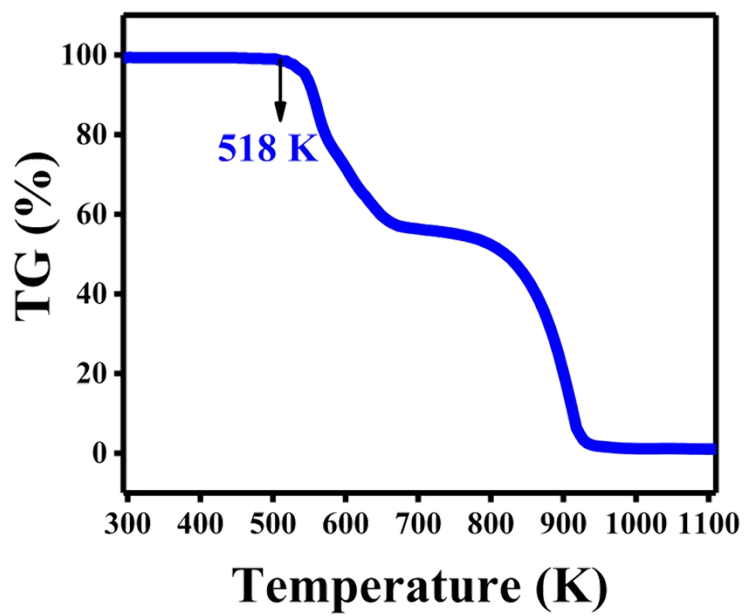

**Figure S6.** Thermal analysis curve of **1**, showing a thermal stability up to ~518 K.

## Table

**Table S1.** Crystal data and structure refinement of **1**.

---

|                                                                   |                                                                                               |
|-------------------------------------------------------------------|-----------------------------------------------------------------------------------------------|
| Empirical formula                                                 | C <sub>15</sub> H <sub>24</sub> Br <sub>2</sub> I <sub>7</sub> N <sub>3</sub> Pb <sub>2</sub> |
| Formula weight                                                    | 1708.87                                                                                       |
| Temperature/K                                                     | 298                                                                                           |
| Crystal system                                                    | monoclinic                                                                                    |
| Space group                                                       | Cc                                                                                            |
| <i>a</i> /Å                                                       | 44.702(8)                                                                                     |
| <i>b</i> /Å                                                       | 8.9866(14)                                                                                    |
| <i>c</i> /Å                                                       | 8.8252(17)                                                                                    |
| $\alpha$ /°                                                       | 90                                                                                            |
| $\beta$ /°                                                        | 97.362(7)                                                                                     |
| $\gamma$ /°                                                       | 90                                                                                            |
| Volume/Å <sup>3</sup>                                             | 3516.1(11)                                                                                    |
| <i>Z</i>                                                          | 4                                                                                             |
| $\rho_{\text{calc}}$ /cm <sup>3</sup>                             | 3.228                                                                                         |
| $\mu$ /mm <sup>-1</sup>                                           | 17.992                                                                                        |
| F(000)                                                            | 2960.0                                                                                        |
| Radiation                                                         | Mo K $\alpha$ ( $\lambda$ = 0.71073)                                                          |
| 2 $\theta$ range for data collection/°                            | 4.624 to 50.05                                                                                |
| Index ranges                                                      | -52 $\leq$ <i>h</i> $\leq$ 52, -10 $\leq$ <i>k</i> $\leq$ 10, -10 $\leq$ <i>l</i> $\leq$ 10   |
| Reflections collected                                             | 14802                                                                                         |
| Independent reflections                                           | 5999 [ <i>R</i> <sub>int</sub> = 0.0916, <i>R</i> <sub>sigma</sub> = 0.1334]                  |
| Data/restraints/parameters                                        | 5999/203/232                                                                                  |
| Goodness-of-fit on <i>F</i> <sup>2</sup>                          | 1.091                                                                                         |
| Final <i>R</i> indexes [ <i>I</i> $\geq$ 2 $\sigma$ ( <i>I</i> )] | <i>R</i> <sub>1</sub> = 0.0933, <i>wR</i> <sub>2</sub> = 0.2016                               |
| Final <i>R</i> indexes [all data]                                 | <i>R</i> <sub>1</sub> = 0.1501, <i>wR</i> <sub>2</sub> = 0.2359                               |

---

**Table S2.** Selected bond lengths of **1**.

| Atom | Atom             | Length/Å | Atom | Atom | Length/Å  |
|------|------------------|----------|------|------|-----------|
| Pb2  | I7               | 3.104(7) | C2   | C7   | 1.39(3)   |
| Pb2  | I4               | 3.258(9) | C2   | C3   | 1.41(3)   |
| Pb2  | I6               | 3.238(8) | C7   | C6   | 1.38(3)   |
| Pb2  | I6 <sup>1</sup>  | 3.200(8) | C3   | C4   | 1.40(2)   |
| Pb2  | I5 <sup>2</sup>  | 3.170(8) | C6   | C5   | 1.39(3)   |
| Pb2  | I5               | 3.176(8) | C4   | C5   | 1.39(3)   |
| I4   | Pb1 <sup>1</sup> | 3.300(9) | C5   | Br1  | 2.00(7)   |
| I6   | Pb2 <sup>3</sup> | 3.200(8) | Br2  | C12  | 1.538(19) |
| I5   | Pb2 <sup>4</sup> | 3.170(8) | C13  | C14  | 1.40(3)   |
| Pb1  | I2               | 3.138(7) | C13  | C12  | 1.43(3)   |
| Pb1  | I3               | 3.213(8) | C14  | C9   | 1.42(3)   |
| Pb1  | I3 <sup>1</sup>  | 3.214(7) | C12  | C11  | 1.43(3)   |
| Pb1  | I1 <sup>4</sup>  | 3.198(9) | C11  | C10  | 1.40(3)   |
| Pb1  | I1               | 3.170(8) | C10  | C9   | 1.43(3)   |
| I3   | Pb1 <sup>3</sup> | 3.214(7) | C9   | C8   | 1.53(3)   |
| I1   | Pb1 <sup>2</sup> | 3.198(9) | C8   | N2   | 1.49(3)   |
| N3   | C1               | 1.50(2)  | N1   | C15  | 1.48(3)   |
| C2   | C1               | 1.70(2)  |      |      |           |

<sup>1</sup>+X,1-Y,-1/2+Z; <sup>2</sup>+X,2-Y,1/2+Z; <sup>3</sup>+X,1-Y,1/2+Z; <sup>4</sup>+X,2-Y,-1/2+Z

**Table S3.** Selected bond angles of **1**.

| Atom             | Atom | Atom            | Angle/°  | Atom            | Atom | Atom             | Angle/°  |
|------------------|------|-----------------|----------|-----------------|------|------------------|----------|
| I7               | Pb2  | I4              | 174.2(2) | I1 <sup>4</sup> | Pb1  | I3 <sup>1</sup>  | 91.8(3)  |
| I7               | Pb2  | I6              | 86.8(2)  | I1              | Pb1  | I3               | 90.7(2)  |
| I7               | Pb2  | I6 <sup>1</sup> | 92.3(2)  | I1              | Pb1  | I3 <sup>1</sup>  | 178.7(3) |
| I7               | Pb2  | I5              | 96.6(3)  | I1              | Pb1  | I1 <sup>4</sup>  | 89.11(9) |
| I7               | Pb2  | I5 <sup>2</sup> | 91.0(2)  | Pb1             | I3   | Pb1 <sup>3</sup> | 158.9(3) |
| I6 <sup>1</sup>  | Pb2  | I4              | 85.6(2)  | Pb1             | I1   | Pb1 <sup>2</sup> | 160.6(3) |
| I6               | Pb2  | I4              | 87.8(2)  | C7              | C2   | C1               | 124(4)   |
| I6 <sup>1</sup>  | Pb2  | I6              | 87.96(9) | C7              | C2   | C3               | 121(4)   |
| I5               | Pb2  | I4              | 88.8(2)  | C3              | C2   | C1               | 114(3)   |
| I5 <sup>2</sup>  | Pb2  | I4              | 91.0(3)  | N3              | C1   | C2               | 101(2)   |
| I5               | Pb2  | I6              | 176.6(3) | C6              | C7   | C2               | 121(5)   |
| I5 <sup>2</sup>  | Pb2  | I6 <sup>1</sup> | 176.4(3) | C4              | C3   | C2               | 116(4)   |
| I5               | Pb2  | I6 <sup>1</sup> | 91.6(3)  | C7              | C6   | C5               | 114(6)   |
| I5 <sup>2</sup>  | Pb2  | I6              | 90.6(3)  | C5              | C4   | C3               | 117(6)   |
| I5 <sup>2</sup>  | Pb2  | I5              | 89.64(9) | C6              | C5   | C4               | 126(6)   |
| Pb2              | I4   | Pb1             | 174.6(2) | C6              | C5   | Br1              | 118(4)   |
| Pb2 <sup>3</sup> | I6   | Pb2             | 159.7(3) | C4              | C5   | Br1              | 114(4)   |
| Pb2 <sup>4</sup> | I5   | Pb2             | 161.0(3) | C14             | C13  | C12              | 126(3)   |
| I2               | Pb1  | I4              | 174.7(2) | C13             | C14  | C9               | 118(5)   |
| I2               | Pb1  | I3              | 92.3(2)  | C13             | C12  | Br2              | 118(3)   |
| I2               | Pb1  | I3 <sup>1</sup> | 86.7(2)  | C13             | C12  | C11              | 106(2)   |
| I2               | Pb1  | I1 <sup>4</sup> | 88.7(2)  | C11             | C12  | Br2              | 136(4)   |
| I2               | Pb1  | I1              | 94.2(2)  | C10             | C11  | C12              | 125(3)   |
| I3               | Pb1  | I4              | 88.1(2)  | C11             | C10  | C9               | 123(3)   |
| I3 <sup>1</sup>  | Pb1  | I4              | 88.0(2)  | C14             | C9   | C10              | 109(3)   |
| I3               | Pb1  | I3 <sup>1</sup> | 88.33(9) | C14             | C9   | C8               | 110(3)   |
| I1 <sup>4</sup>  | Pb1  | I4              | 90.9(3)  | C10             | C9   | C8               | 125(7)   |
| I1               | Pb1  | I4              | 91.0(2)  | N2              | C8   | C9               | 110(3)   |
| I1 <sup>4</sup>  | Pb1  | I3              | 179.0(3) |                 |      |                  |          |

<sup>1</sup>+X,1-Y,-1/2+Z; <sup>2</sup>+X,2-Y,1/2+Z; <sup>3</sup>+X,1-Y,1/2+Z; <sup>4</sup>+X,2-Y,-1/2+Z



**Table S4.** Hydrogen bonds of **1**.

| D-H    | d(D-H) | d(H..A) | <DHA   | d(D..A) | A                           |
|--------|--------|---------|--------|---------|-----------------------------|
| N3-H3A | 0.890  | 2.974   | 132.13 | 3.631   | I3 [ x, -y+1, z-1/2 ]       |
| N3-H3A | 0.890  | 3.287   | 113.80 | 3.736   | I1 [ x, y-1, z ]            |
| N3-H3B | 0.890  | 3.073   | 172.39 | 3.957   | I2 [ x, -y+1, z+1/2 ]       |
| N3-H3C | 0.890  | 2.681   | 174.14 | 3.567   | I2                          |
| N2-H2A | 0.890  | 3.122   | 134.57 | 3.800   | I7 [ x-1/2, y+1/2, z ]      |
| N2-H2A | 0.890  | 3.240   | 132.55 | 3.898   | I6 [ x-1/2, -y+3/2, z-1/2 ] |
| N2-H2C | 0.890  | 2.583   | 172.30 | 3.468   | I5 [ x-1/2, y-1/2, z ]      |
| N1-H1C | 0.890  | 3.191   | 145.99 | 3.960   | I1 [ x, -y+2, z+1/2 ]       |
| N1-H1D | 0.890  | 3.243   | 146.31 | 4.014   | I4 [ x, y, z+1 ]            |
| N1-H1E | 0.890  | 3.244   | 111.83 | 3.669   | I3                          |
